# Supplementary figures and images for: Specific cellular signal-transduction responses to in vivo combination therapy with ATRA, valproic acid and theophylline in acute myeloid leukemia
Source: PubMed Central journal article supplement — Blood Cancer J. 2011 Feb 11;1(2):e4–. doi: 10.1038/bcj.2011.2 (PMC3255270; doi:10.1038/bcj.2011.2), 2011-02-11

Figure S2B.

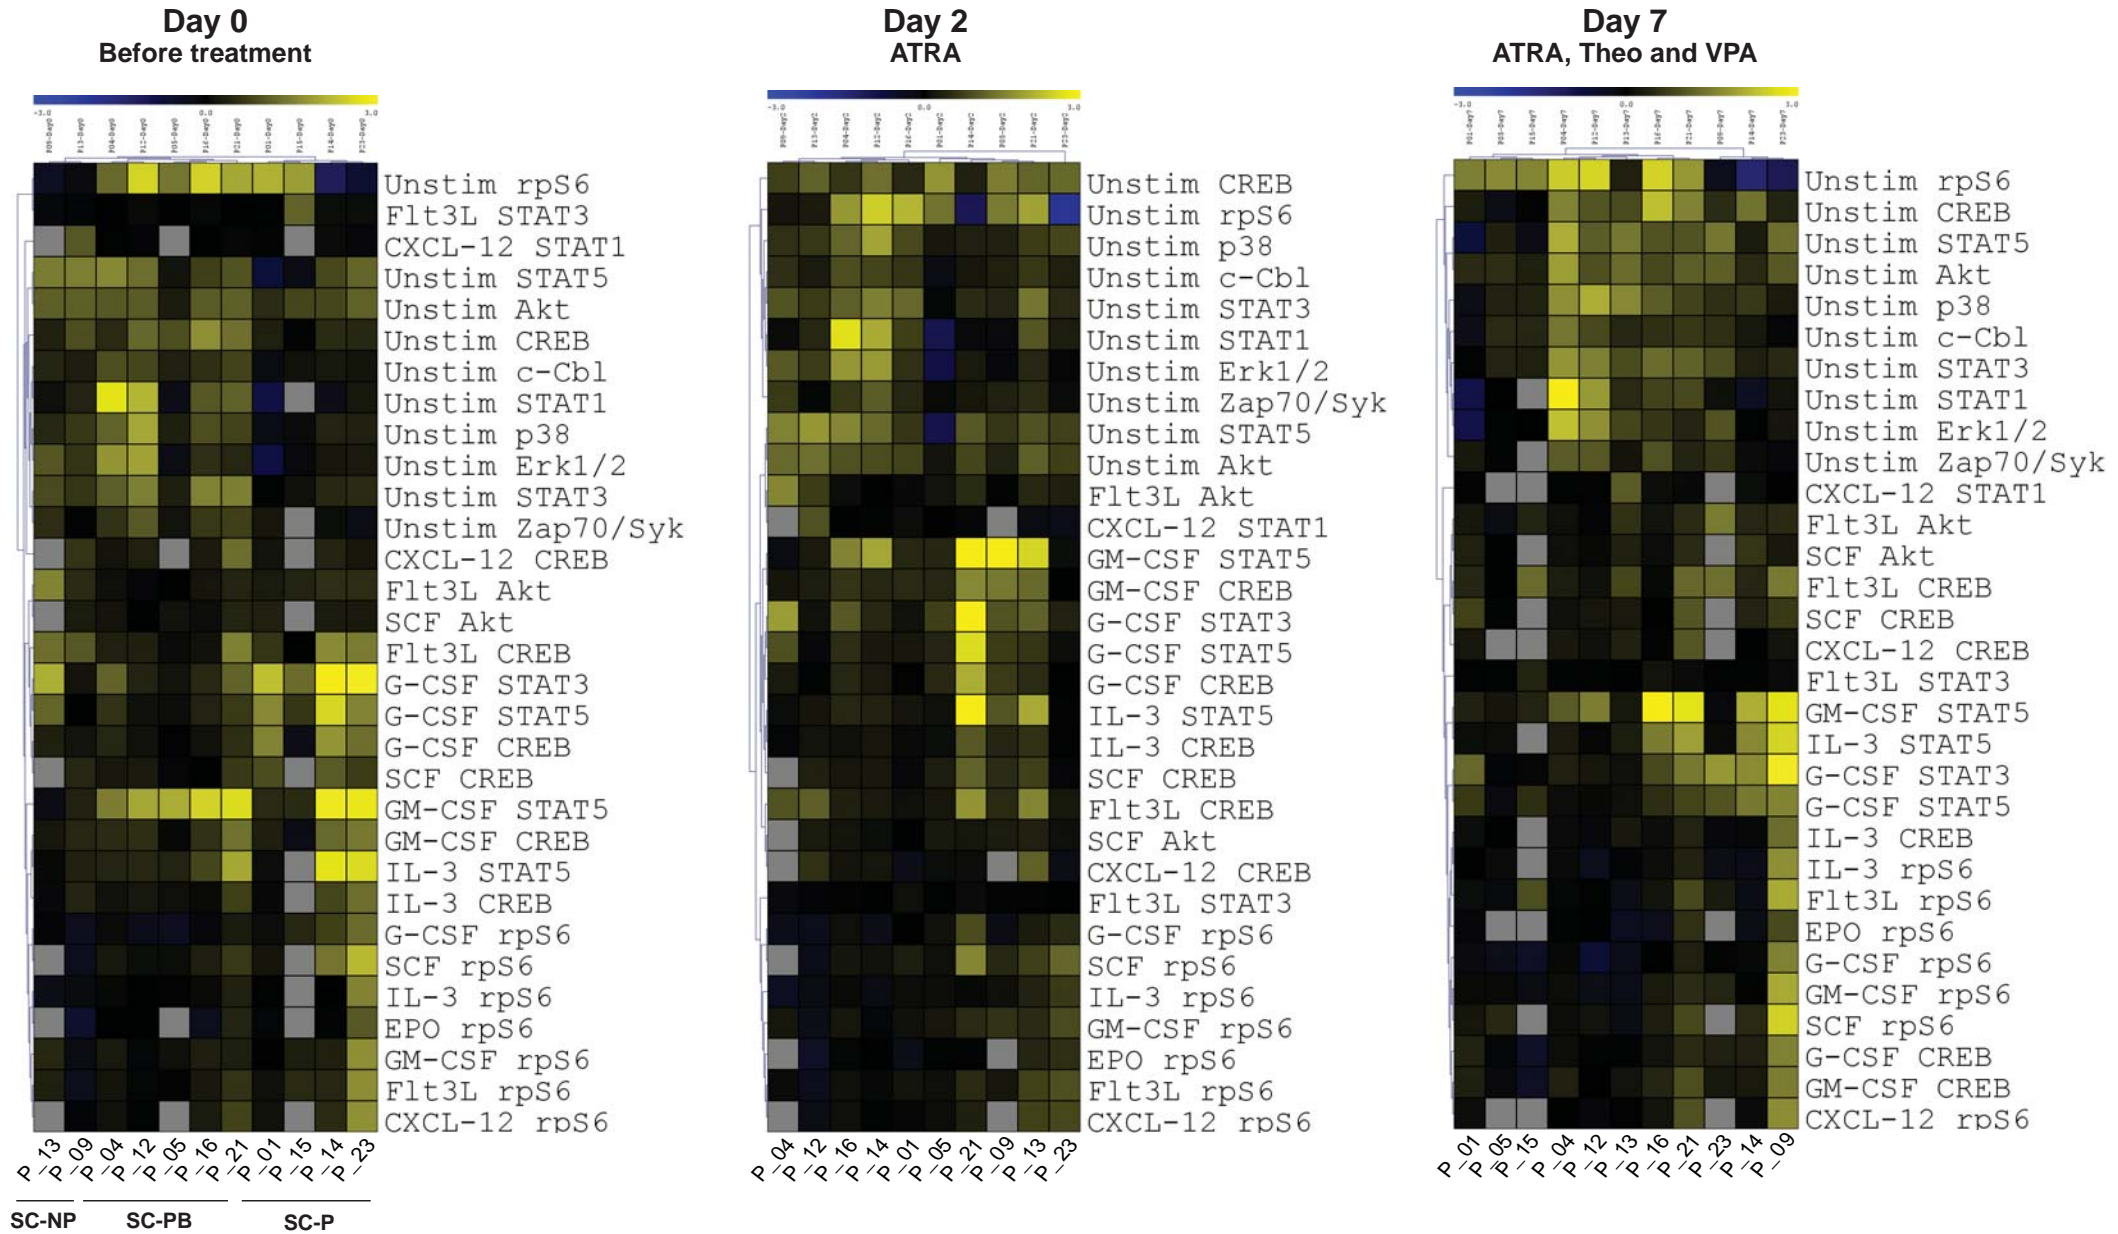

Supplement: bcj20112x3.pdf [file bcj20112x3.pdf]
